# Supplementary material for: Host cell response and distinct gene expression profiles at different stages of Chlamydia trachomatis infection reveals stage-specific biomarkers of infection
Source: PubMed Central journal article supplement (PMC7784309; doi:10.1186/s12866-020-02061-6), 2021-01-04

## Supplementary Fig. 2

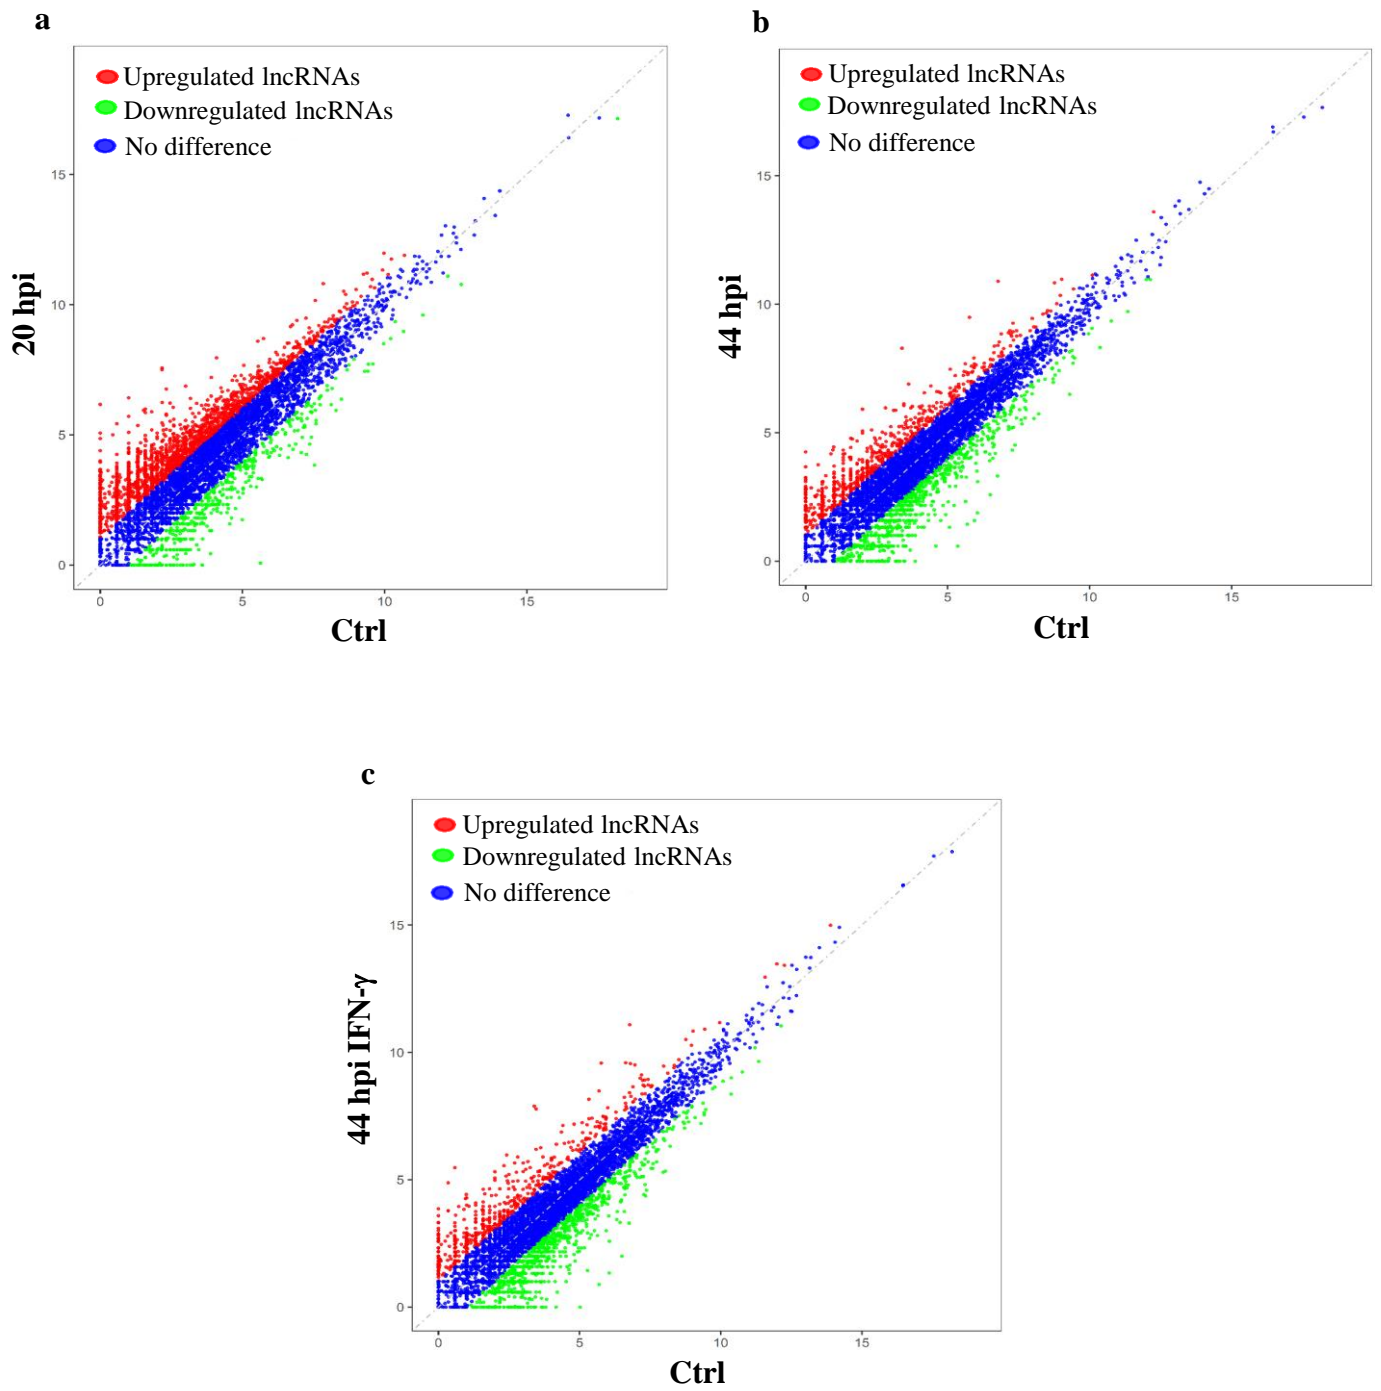

Supplement: 12866_2020_2061_MOESM2_ESM.pdf [file 12866_2020_2061_MOESM2_ESM.pdf]
